# Supplementary material for: Prevalence of Parkinson’s disease across North America
Source: PubMed Central journal article supplement (PMC6039505; doi:10.1038/s41531-018-0058-0), 2018-07-10
Supplement: 41531_2018_58_MOESM1_ESM.pdf [file 41531_2018_58_MOESM1_ESM.pdf]

eTable 1: Prevalence of PD by study, age group and sex

| Group               | Study, year    | Denominator* | Cases* | Prevalence /100,000 | 95% CI /100,000 |
|---------------------|----------------|--------------|--------|---------------------|-----------------|
| <b>Women, 45-54</b> |                |              |        |                     |                 |
|                     | CPDR-PP 2010   | 265792       | 102    | 38                  | 32-47           |
|                     | KPNC 2010      | 218687       | 105    | 48                  | 40-58           |
|                     | Ontario 2010   | 1050338      | 51     | 51                  | 47-56           |
|                     | REP 2006       | 10543        | 4      | 38                  | 14-101          |
| <b>Men, 45-54</b>   |                |              |        |                     |                 |
|                     | CPDR-PP 2010   | 273684       | 182    | 67                  | 58-77           |
|                     | KPNC 2010      | 200300       | 118    | 59                  | 49-71           |
|                     | Ontario 2010   | 1048484      | 739    | 70                  | 66-76           |
|                     | REP 2006       | 9928         | 9      | 91                  | 47-174          |
|                     | HAAS 1965-2012 | 21,410       | 8      | 37                  | 0-110           |
| <b>Women 55-64</b>  |                |              |        |                     |                 |
|                     | CPDR-PP 2010   | 199924       | 366    | 183                 | 165-203         |
|                     | KPNC 2010      | 205864       | 379    | 184                 | 166-204         |
|                     | Ontario 2010   | 817224       | 1507   | 184                 | 175-194         |
|                     | REP 2006       | 6831         | 10     | 146                 | 79-272          |
| <b>Men 55-64</b>    |                |              |        |                     |                 |
|                     | CPDR-PP 2010   | 191816       | 520    | 271                 | 249-295         |

|             |                |        |      |      |           |
|-------------|----------------|--------|------|------|-----------|
|             |                |        |      |      |           |
|             | KPNC 2010      | 179737 | 492  | 274  | 251-299   |
|             | Ontario 2010   | 779878 | 2139 | 274  | 263-286   |
|             | REP 2006       | 6191   | 10   | 162  | 87-300    |
|             | HAAS 1965-2012 | 60750  | 124  | 204  | 115-306   |
| Women 65-74 |                |        |      |      |           |
|             | CPDR-PP 2010   | 118445 | 719  | 607  | 564-653   |
|             | KPNC 2010      | 122013 | 818  | 670  | 626-718   |
|             | Ontario 2010   | 513982 | 3008 | 585  | 565-607   |
|             | REP 2006       | 4275   | 26   | 608  | 414-893   |
|             |                |        |      |      |           |
| Men 65-74   |                |        |      |      |           |
|             | CPDR-PP 2010   | 104023 | 979  | 941  | 884-1002  |
|             | KPNC 2010      | 103846 | 1094 | 1053 | 993-1118  |
|             | Ontario 2010   | 461011 | 4227 | 917  | 890-945   |
|             | REP 2006       | 3848   | 58   | 1507 | 1165-1950 |
|             | HAAS 1965-2012 | 68101  | 337  | 495  | 361-641   |
| Women 75-84 |                |        |      |      |           |
|             | CPDR-PP 2010   | 74553  | 1260 | 1690 | 1599-1786 |
|             | KPNC 2010      | 75674  | 1574 | 2080 | 1980-2185 |
|             | Ontario 2010   | 351193 | 5102 | 1453 | 1413-1493 |
|             | Rochester 2006 | 3117   | 39   | 1251 | 914-1713  |

|           |                |        |      |      |           |
|-----------|----------------|--------|------|------|-----------|
|           |                |        |      |      |           |
|           |                |        |      |      |           |
| Men 75-84 |                |        |      |      |           |
|           | CPDR-PP 2010   | 55646  | 1359 | 2442 | 2316-2576 |
|           | KPNC 2010      | 58368  | 1817 | 3113 | 2973-3260 |
|           | Ontario 2010   | 267872 | 5871 | 2192 | 2136-2249 |
|           | REP 2006       | 2254   | 73   | 3239 | 2575-4074 |
|           | HAAS 1965-2012 | 49724  | 796  | 1601 | 1326-1898 |
| Women 85+ |                |        |      |      |           |
|           | CPDR-PP 2010   | 35276  | 757  | 2146 | 1998-2304 |
|           | KPNC 2010      | 32308  | 1205 | 3730 | 3525-3946 |
|           | Ontario 2010   | 159784 | 2818 | 1764 | 1700-1830 |
|           | REP 2006       | 1628   | 30   | 1843 | 1299-2636 |
|           |                |        |      |      |           |
| Men 85+   |                |        |      |      |           |
|           | CPDR-PP 2010   | 19638  | 688  | 3503 | 3251-3775 |
|           | KPNC 2010      | 18088  | 963  | 5324 | 49985671  |
|           | Ontario 2010   | 76021  | 2117 | 2765 | 2669-2906 |
|           | REP 2006       | 660    | 36   | 5455 | 3934-7562 |
|           | HAAS 1965-2012 | 22630  | 516  | 2280 | 1785-2824 |

REP=Rochester Epidemiology Project, CPDR-PP= California Parkinson's disease Registry-Pilot Project, KPNC=Kaiser Permanente Northern California

\*All denominator and case units are individuals except for the HAAS study, for which the units are person-years

eTable2: Statistical tests of heterogeneity for random effects models.

| Sex           | Age (years) | I <sup>2</sup> (95%-confidence interval) | Q     | p-value |
|---------------|-------------|------------------------------------------|-------|---------|
| <b>Male</b>   |             |                                          |       |         |
|               | 45-54       | 0 (0 - 85)                               | 4.2   | 0.2456  |
|               | 55-64       | 0 (0 - 85)                               | 2.8   | 0.4189  |
|               | 56-74       | 93 (86 - 97)                             | 29.4  | 0.0000  |
|               | 75-84       | 97 (95 - 98)                             | 178.3 | 0.0000  |
|               | 85+         | 98 (97 - 99)                             | 286.1 | 0.0000  |
| <b>Female</b> |             |                                          |       |         |
|               | 45-54       | 48 (0 - 83)                              | 7.3   | 0.0621  |
|               | 55-64       | 0 (0 - 85)                               | 0.5   | 0.9101  |
|               | 56-74       | 64 (0 - 88)                              | 11.9  | 0.0077  |
|               | 75-84       | 97 (95 - 98)                             | 162.0 | 0.0000  |
|               | 85+         | 99 (98 - 99)                             | 474.9 | 0.0000  |
